# Supplementary material for: Real-Time Ultrasonography and the Evaluation of Static Images Yield Different Results in the Assessment of EU-TIRADS Categories
Source: MDPI journal article supplement (doi:10.3390/jcm12185809), 2023-09-06
Supplement: s1 [file s1]

**Table S1.** Percentage of concordant assignments of EU-TIRADS category on static US in relation to real-time US as compared to the number of analyzed images (sections) and the nodule's size for raters A, B and C.

| % (No.) of concordant assignments of EU-TIRADS category on static US in relation to real-time US |                        |                          |                            |                          |                          |
|--------------------------------------------------------------------------------------------------|------------------------|--------------------------|----------------------------|--------------------------|--------------------------|
| rater A                                                                                          | rater B                | rater C                  | rater A                    | rater B                  | rater C                  |
| single image - transverse section                                                                |                        |                          | two images - both sections |                          |                          |
| 81.8<br>(54 out of 66)                                                                           | 71.4<br>(60 out of 84) | 74.1<br>(109 out of 147) | 74.8<br>(151 out of 202)   | 74.7<br>(148 out of 198) | 67.6<br>(98 out of 145)  |
| nodules ≤ 10 mm                                                                                  |                        |                          | nodules > 10 mm            |                          |                          |
| 74.2<br>(46 out of 62)                                                                           | 70.7<br>(29 out of 41) | 62.5<br>(30 out of 48)   | 77.2<br>(159 out of 206)   | 74.3<br>(179 out of 241) | 72.5<br>(177 out of 244) |

No statistically significant differences were observed

**Table S2.** Frequencies of particular categories of EU-TIRADS and sonographic risk features as assigned by raters A, B and C on static US – analysis of 842 nodules.

| category/feature        | % (No.) of cases |            |            | p                                 |
|-------------------------|------------------|------------|------------|-----------------------------------|
|                         | rater A          | rater B    | rater C    |                                   |
| EU-TIRADS 2             | 1.1 (9)          | 1.0 (8)    | 1.0 (8)    | NS                                |
| EU-TIRADS 3             | 34.7 (292)       | 41.9 (353) | 41.3 (348) | <0.005 A vs. B & C                |
| EU-TIRADS 4             | 44.7 (376)       | 42.9 (361) | 37.3 (314) | <0.005 C vs. A<br><0.05 C vs. B   |
| EU-TIRADS 5             | 19.6 (165)       | 14.3 (120) | 20.4 (172) | <0.005 B vs. A & C                |
| marked hypoechogenicity | 6.8 (57)         | 1.3 (11)   | 3.3 (28)   | <0.005 A vs. C<br><0.0001 A vs. B |
| non-oval shape          | 12.7 (107)       | 10.6 (89)  | 13.2 (111) | NS                                |
| irregular margins       | 7.6 (64)         | 4.6 (39)   | 5.7 (48)   | <0.05 A vs. B                     |
| microcalcifications     | 1.3 (11)         | 0.5 (4)    | 2.0 (17)   | <0.01 B vs. C                     |
| hypoechogenicity        | 53.8 (453)       | 51.8 (436) | 48.3 (407) | <0.05 A vs. C                     |
| solid composition       | 69.2 (583)       | 80.9 (682) | 91.3 (770) | <0.0001 A vs. B & C               |
| cystic/spongiform       | 1.3 (11)         | 1.2 (10)   | 1.1 (9)    | NS                                |
| macrocalcifications     | 6.9 (58)         | 10.6 (89)  | 6.4 (54)   | <0.01 B vs. A & C                 |

**Table S3.** Concordance of nodule classification into EU-TIRADS categories among participating raters evaluating static US in relation to the number of analyzed images as well as nodule's size: nodules  $\leq 10$  mm or larger.

| % (No.) of concordant assignment of EU-TIRADS category – static US |               |               |               |                                  |               |               |               |
|--------------------------------------------------------------------|---------------|---------------|---------------|----------------------------------|---------------|---------------|---------------|
| single image – transverse section (297)                            |               |               |               | two images – both sections (545) |               |               |               |
| Rater                                                              | A             | B             | All 3         | rater                            | A             | B             | All 3         |
| B                                                                  | 72.1<br>(214) | -             | 62.0<br>(184) | B                                | 71.4<br>(389) | -             | 57.8<br>(315) |
| C                                                                  | 75.4<br>(224) | 74.4<br>(221) |               | C                                | 70.6<br>(385) | 71.2<br>(388) |               |
| nodules $\leq 10$ mm (151)                                         |               |               |               | nodules $>10$ mm (691)           |               |               |               |
| Rater                                                              | A             | B             | All 3         | rater                            | A             | B             | All 3         |
| B                                                                  | 66.2<br>(100) | -             | 55.0<br>(83)  | B                                | 72.8<br>(503) | -             | 60.2<br>(416) |
| C                                                                  | 74.8<br>(113) | 67.5<br>(102) |               | C                                | 71.8<br>(496) | 73.4<br>(507) |               |

No statistically significant differences were observed
